# Supplementary material
Source: PubMed Central journal article supplement (PMC10046259)
Supplement: NIHMS1816737-supplement-suppl_material.pdf [file NIHMS1816737-supplement-suppl_material.pdf]

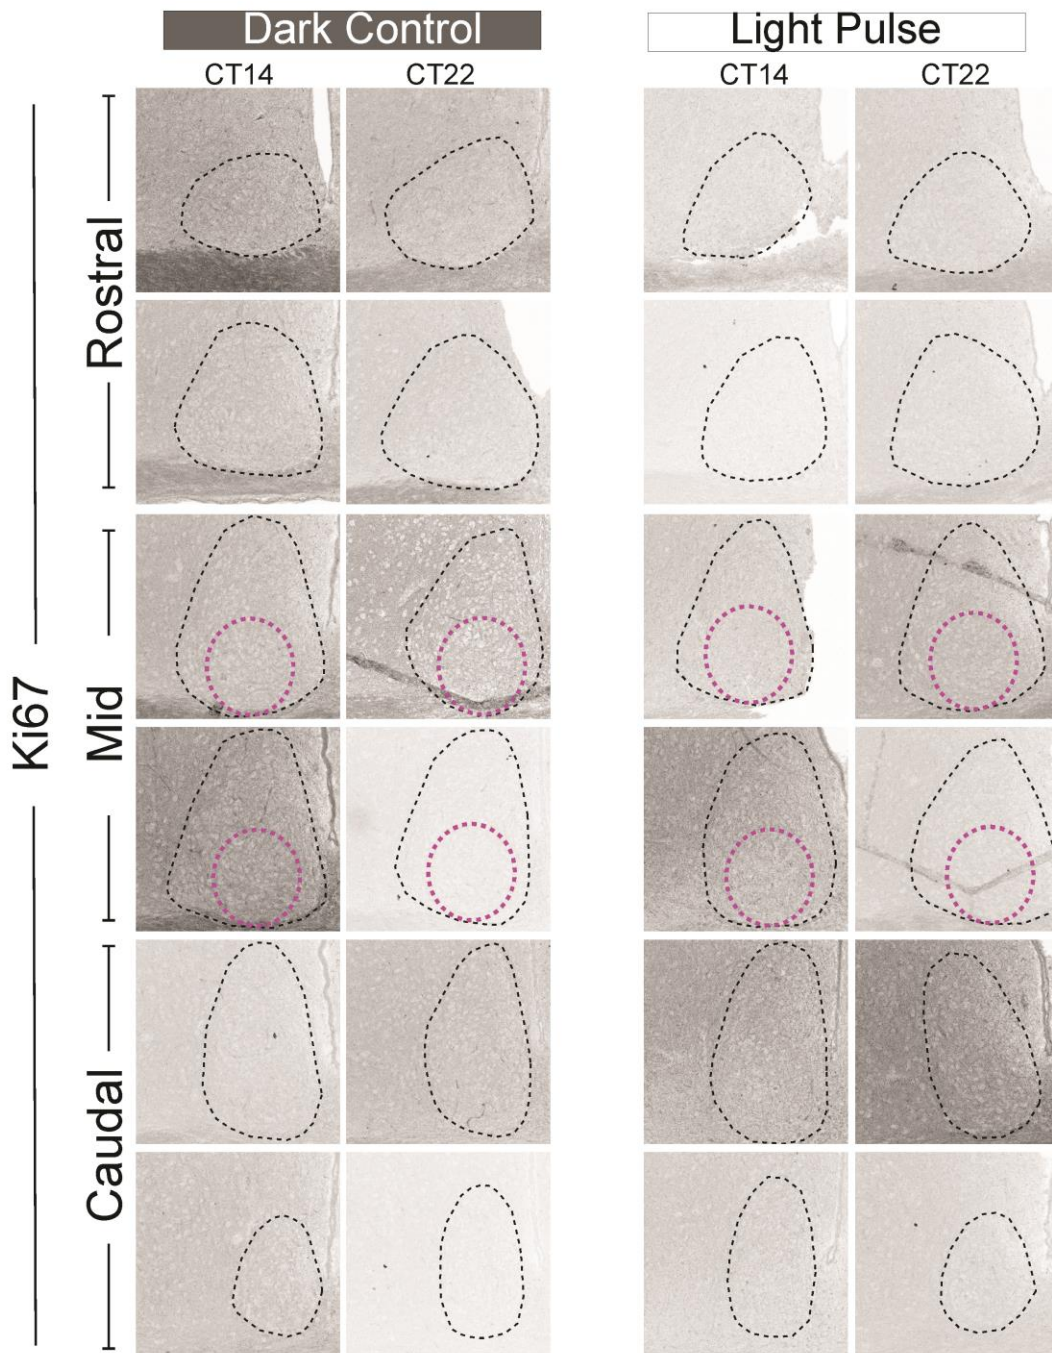

Supplementary Figure 1: Ki67 expression in dark control and following light pulse throughout rostral-caudal levels of the SCN after 15-minute light pulse at CT 14 or CT22.

Magenta circles show the SCN core. Black lines show the outline of the SCN. All areas outside of the magenta circles but within the black lines were considered the SCN shell. Scale bar: 94  $\mu\text{m}$ .
